# Supplementary material for: A genome wide association scan for (1,3;1,4)-β-glucan content in the grain of contemporary 2-row Spring and Winter barleys
Source: PubMed Central journal article supplement (PMC4213503; doi:10.1186/1471-2164-15-907), 2014-10-17

A

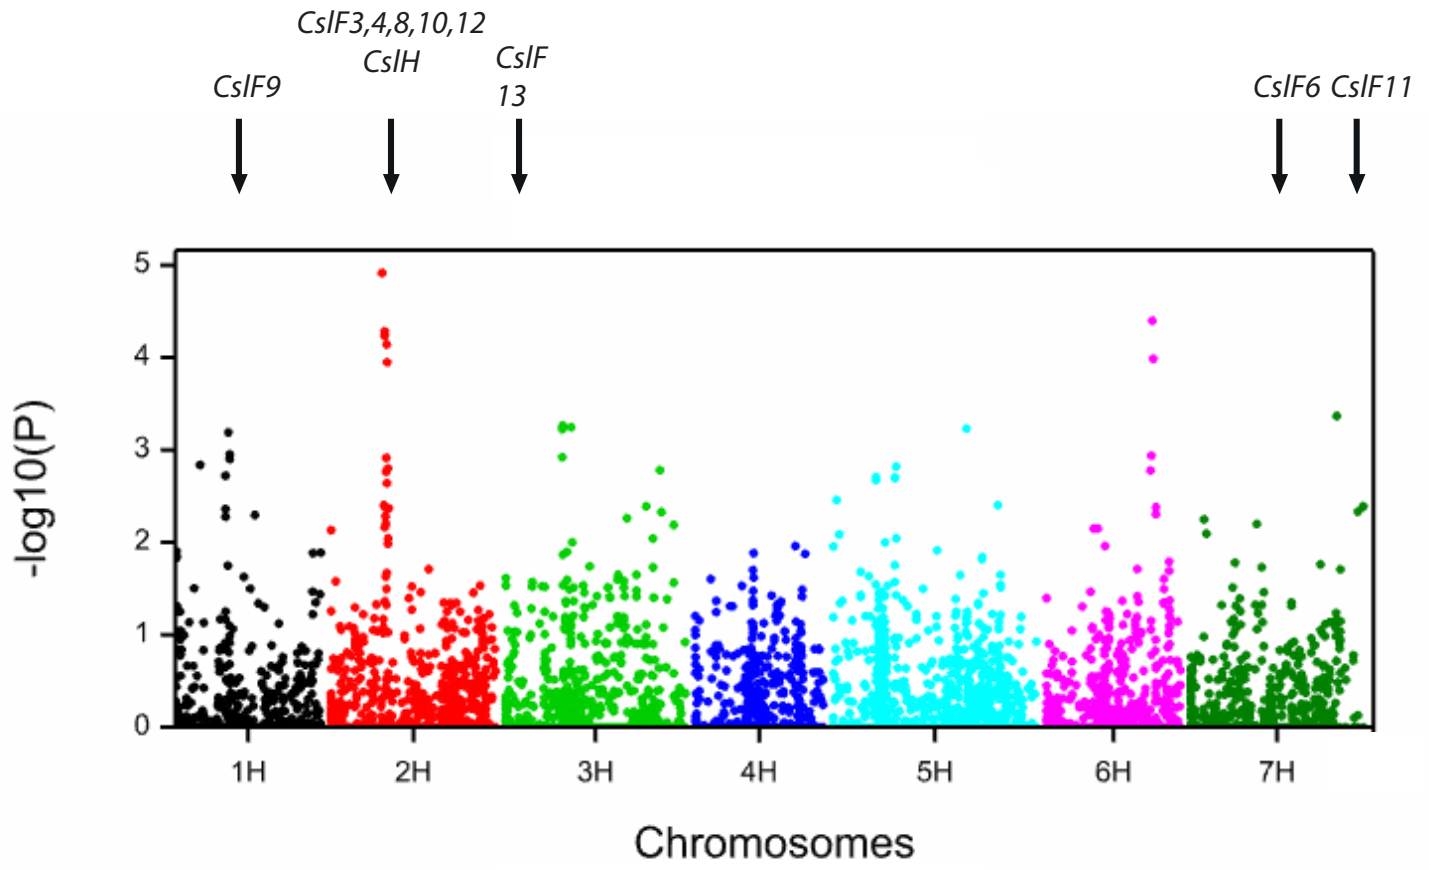

B

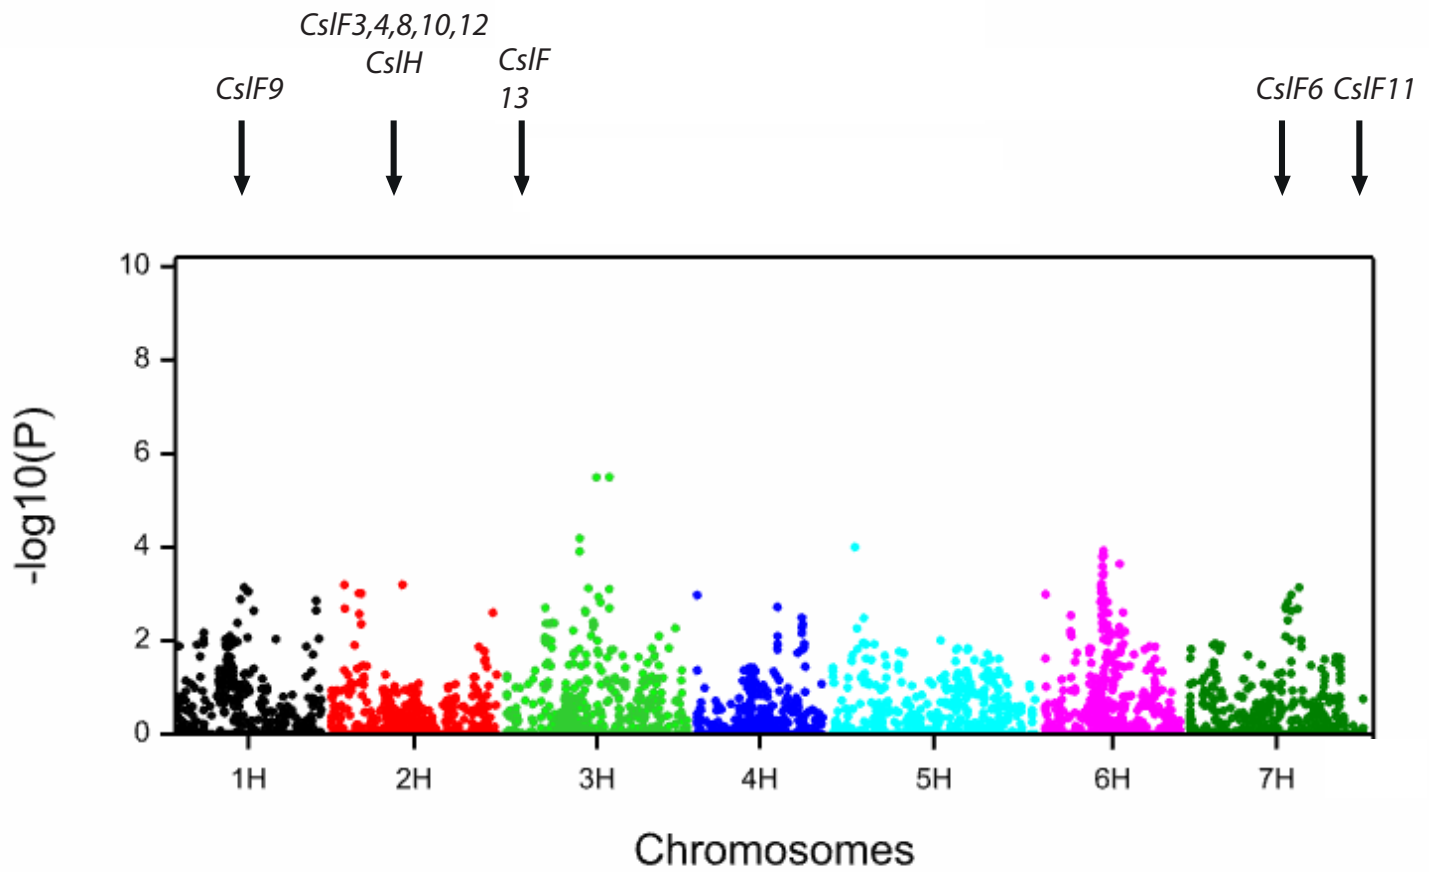

Supplement: 12864_2014_6608_MOESM1_ESM.pdf [file 12864_2014_6608_MOESM1_ESM.pdf]
